# Supplementary material for: Lentivector cryptic splicing mediates increase in CD34+ clones expressing truncated HMGA2 in human X-linked severe combined immunodeficiency
Source: PubMed Central journal article supplement (PMC9240040; doi:10.1038/s41467-022-31344-x), 2022-06-28
Supplement: 41467_2022_31344_MOESM1_ESM.pdf [file 41467_2022_31344_MOESM1_ESM.pdf]

# Supplementary Materials for

## Lentivector cryptic splicing mediates increase in CD34+ clones expressing truncated *HMGA2* in human SCID-X1

### Authors:

\*Suk See De Ravin<sup>1</sup>, Siyuan Liu<sup>2</sup>, Colin L. Sweeney<sup>1</sup>, Julie Brault<sup>1</sup>, Narda Whiting-Theobald<sup>1</sup>, Michelle Ma<sup>1</sup>, Taylor Liu<sup>1</sup>, Uimook Choi<sup>1</sup>, Janet Lee<sup>1</sup>, Sandra Anaya O'Brien<sup>1</sup>, Priscilla Quackenbush<sup>1</sup>, Tyra Estwick<sup>1</sup>, Anita Karra<sup>1</sup>, Ethan Docking<sup>1</sup>, Nana Kwatema<sup>1</sup>, Shuang Guo<sup>2</sup>, Ling Su<sup>2</sup>, Zhonghe Sun<sup>2</sup>, Sheng Zhou<sup>3</sup>, Jennifer Puck<sup>4</sup>, Morton J. Cowan<sup>4</sup>, Luigi D. Notarangelo<sup>1</sup>, Elizabeth Kang<sup>1</sup>, \*Harry L. Malech<sup>1</sup>, \*Xiaolin Wu<sup>1</sup>

### Affiliations:

<sup>1</sup> Laboratory of Clinical Immunology and Microbiology, NIAID, NIH, Bethesda, MD 20892

<sup>2</sup> Cancer Research Technology Program, Leidos Biomedical Research, Inc., Frederick National Laboratory for Cancer Research, Frederick, MD, 21702

<sup>3</sup> Experimental Cell Therapeutics Lab, St. Jude Children's Research Hospital, Memphis, TN, 38105

<sup>4</sup> Division of Allergy Immunology and Blood and Marrow Transplantation, Department of Pediatrics, University of California San Francisco and UCSF Benioff Children's Hospital, San Francisco CA, 94143

### \* Correspondence:

1. Suk See DeRavin, MD, PhD

sderavin@niaid.nih.gov

2. Harry L. Malech, MD

hmalech@niaid.nih.gov

3. Xiaolin Wu PhD

forestwu@mail.nih.gov

## Supplementary information includes:

1. Supplementary Methods detailing the calculations for clonal abundance.
2. Supplementary Figure S1 shows the sequence of the fusion transcript showing the alternate splicing generated by the splicing donor (SD) of HMGA2 exon 3 and a cryptic splicing acceptor (SA) in the cHS4-400 element in the vector LTR.
3. Supplementary Figure S2 shows the dynamics of clonal composition in each cell lineage after gene therapy for P1, P3, P4, P5, P6, P7 and P8. Each color denotes a unique vector insertion clone. The size of each color-coded bar reflects the relative contribution of each insert clone.
4. Supplementary Figure S3 Graphs summarizing the top three vector insertion sites in peripheral blood polymorphonuclear, CD14+ myeloid, and NK cells in P3. The gray, orange and blue graphs represent relative frequencies of vector inserts in *HMGA2*, *SIK3* and *NF1*.
5. Supplementary Figure S4 Graphs summarizing the top seven vector insertion sites in peripheral blood polymorphonuclear and NK cells in P4, color-coded as indicated. The identical kinetics of the multiple inserts, for example, of *HMGA2*, *DNM2*, *PCNT*, *SCA1*, *SAE1m IGFBP2* suggests multiple inserts in a clone, and another clone with *HMGA2* and *KIFC1* and their course following gene therapy.
6. Supplementary Figure S6 Flow cytometric gating strategy for evaluation of *in vitro* T-cell development from CD34+ cells using Artificial Thymic Organoids.
7. Supplementary Table S1 shows top vector integration sites and multicopy clones identified in P1, P3, P4 and P6 by VIS frequency correlation. Detailed information is also provided as Supplemental Data in excel document.
8. Supplementary Table S2 shows fusion Transcripts created by vector gene trapping of targeted genes in inducible pluripotent stem clones. VIS that are in the same orientation of gene and inside introns are highlighted and expected to result in premature termination. Detailed information is provided in Supplemental Data (Excel document).

Figure S1

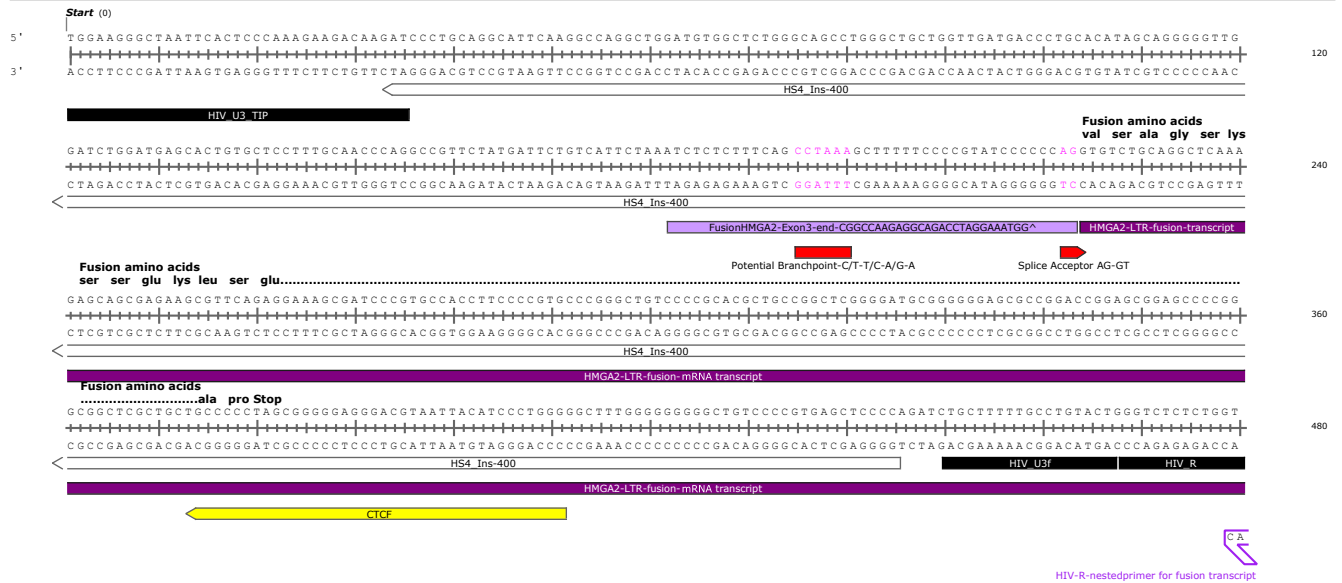

Figure S1

LV CL20-i4-EF1a-hgcOPT insert with HMGA2 splice fusion annotation (Linear, 4638basepairs). Shown is the vector insert sequence following lentivector insertion in the CD34+ cell genome. The genomic sequence of the insert site begins before the shown 5' end and after the 3' end of the vector insert sequence. The figure is shown with annotations as for an insertion into HMGA2 intron 3, and the generation of a truncated fusion RNA transcript when the vector is inserted in the sense (forward) orientation within an intron of any expressed gene.

**Figure S2**

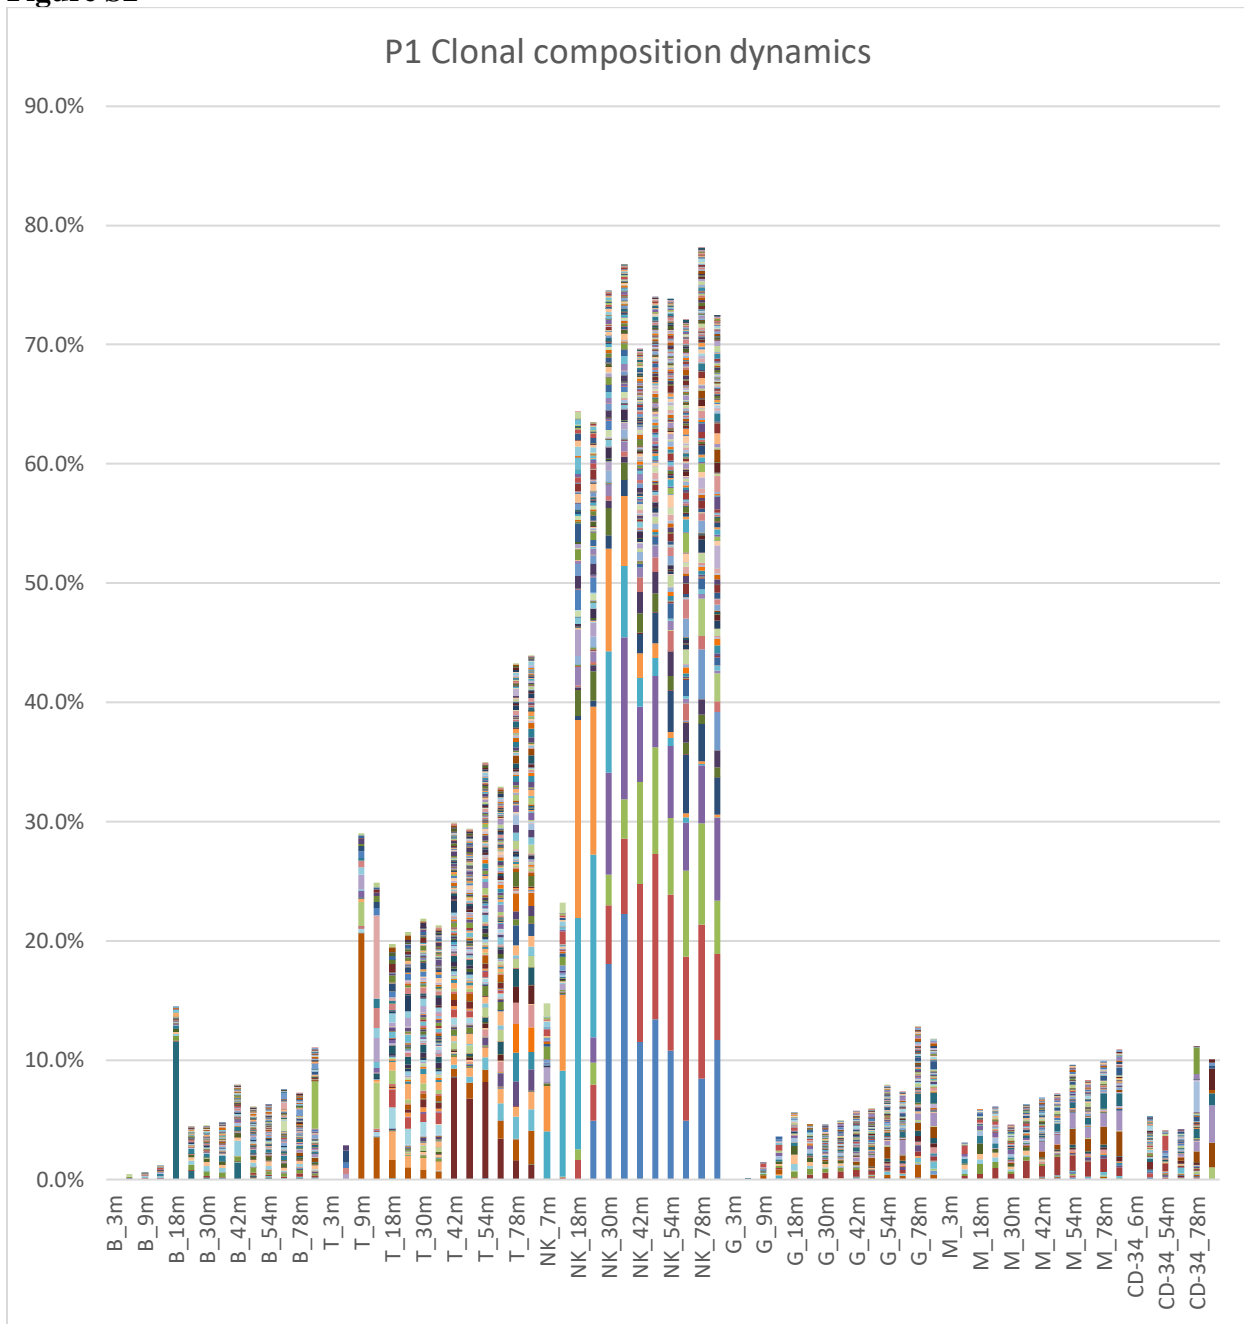

### P3 clonal composition dynamics

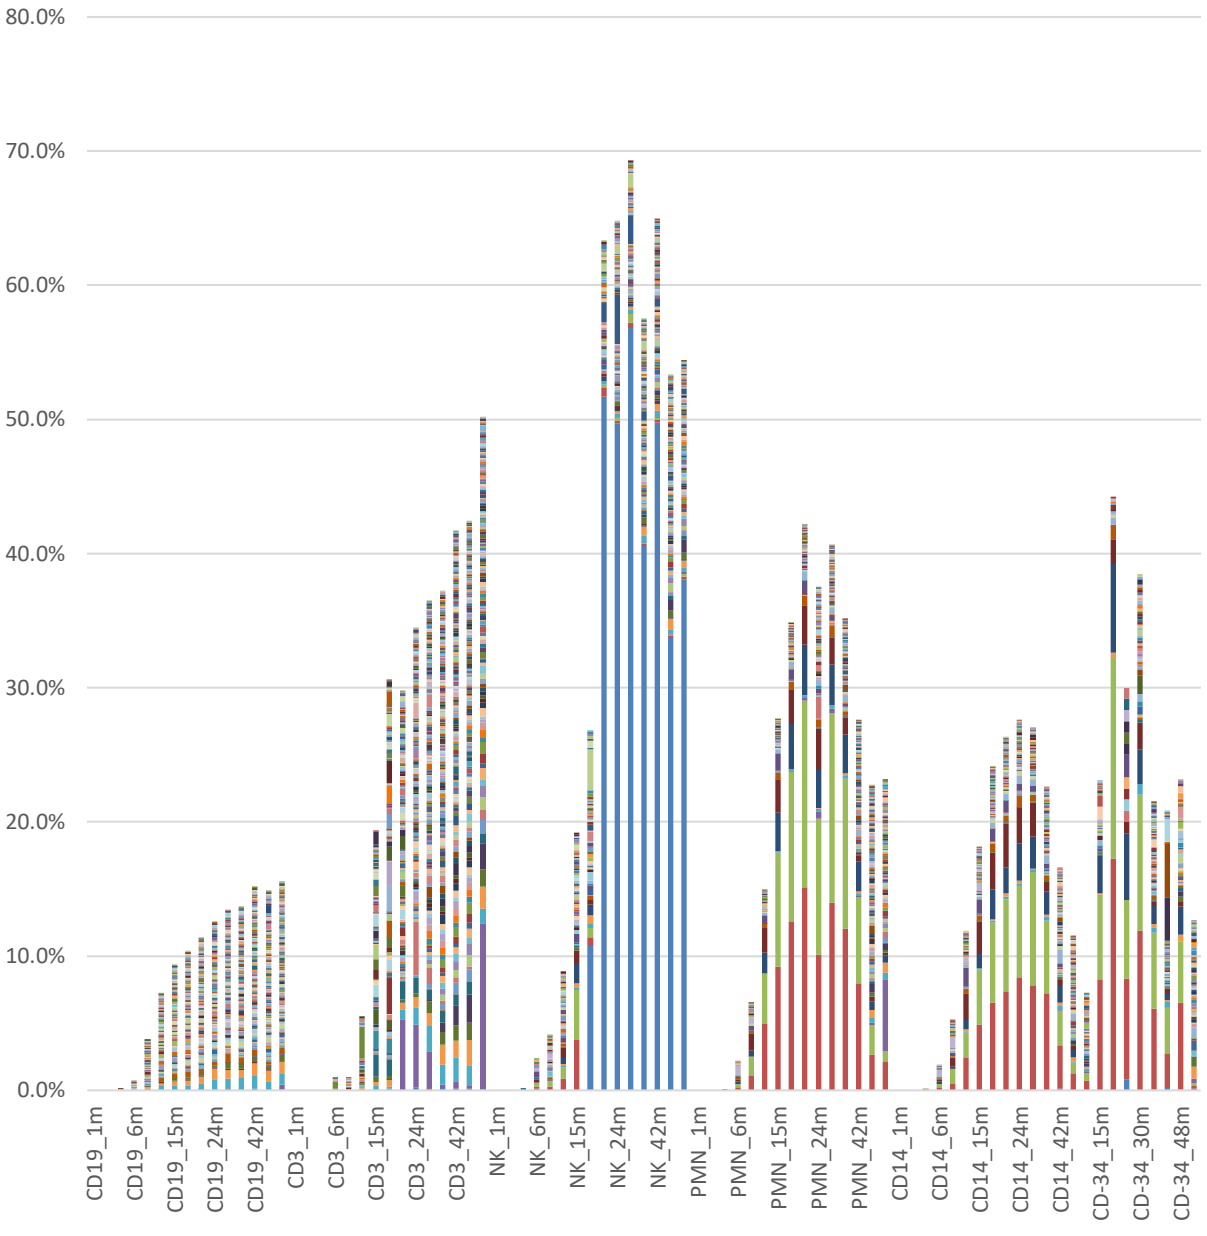

# P4 clonal composition dynamics

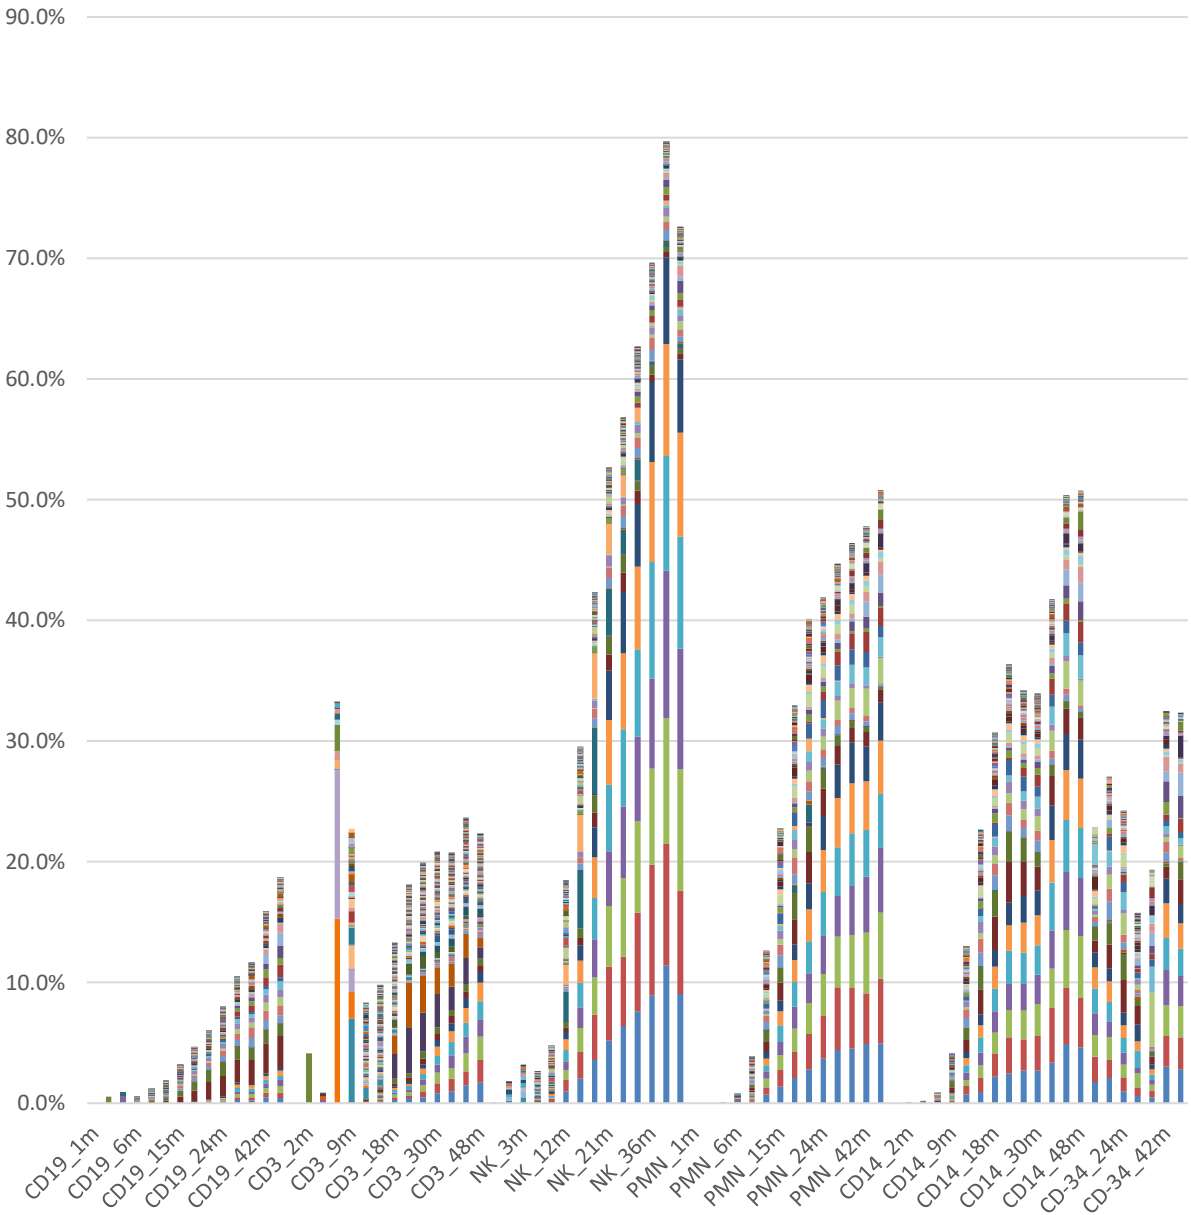

# P5 clonal composition dynamics

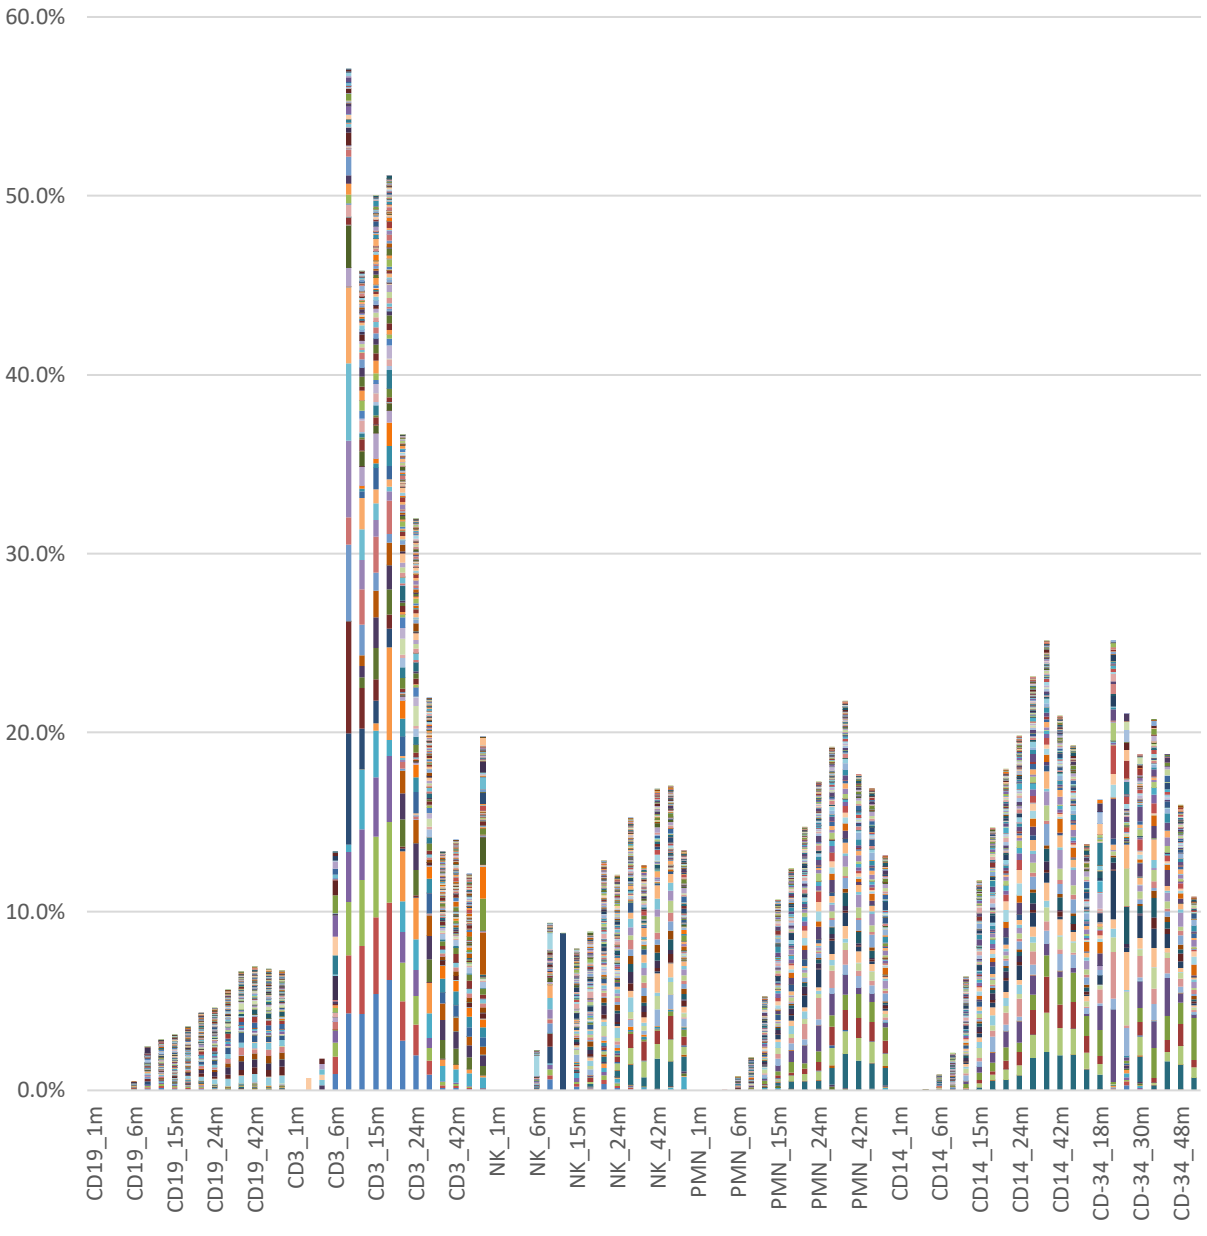

# P6 clonal composition dynamics

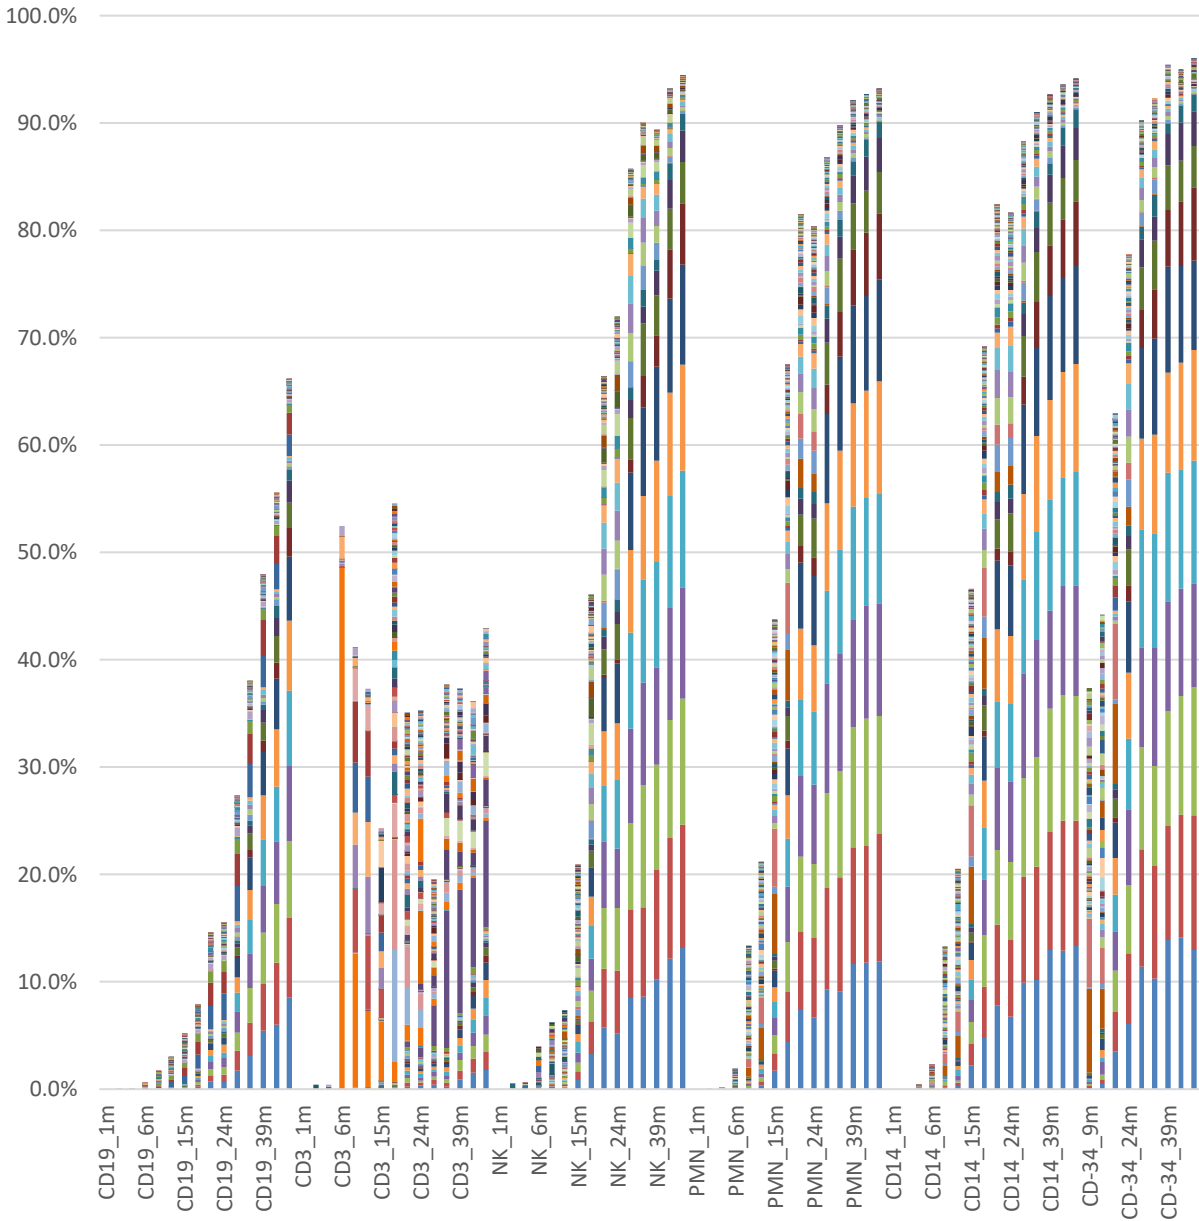



# P7 clonal composition dynamics

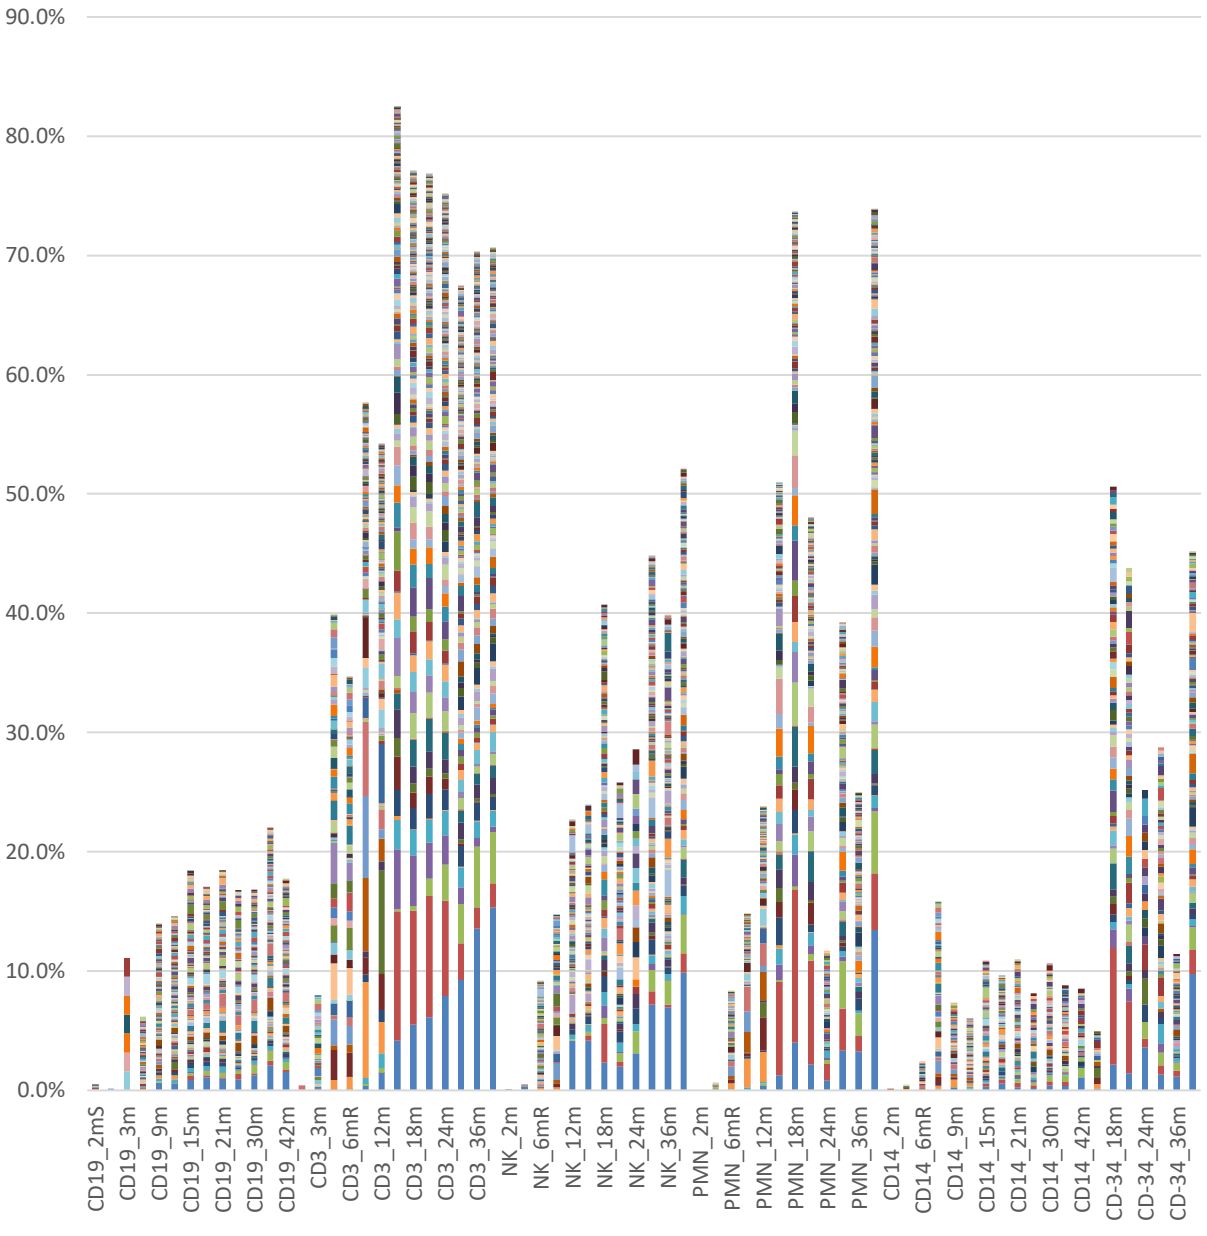

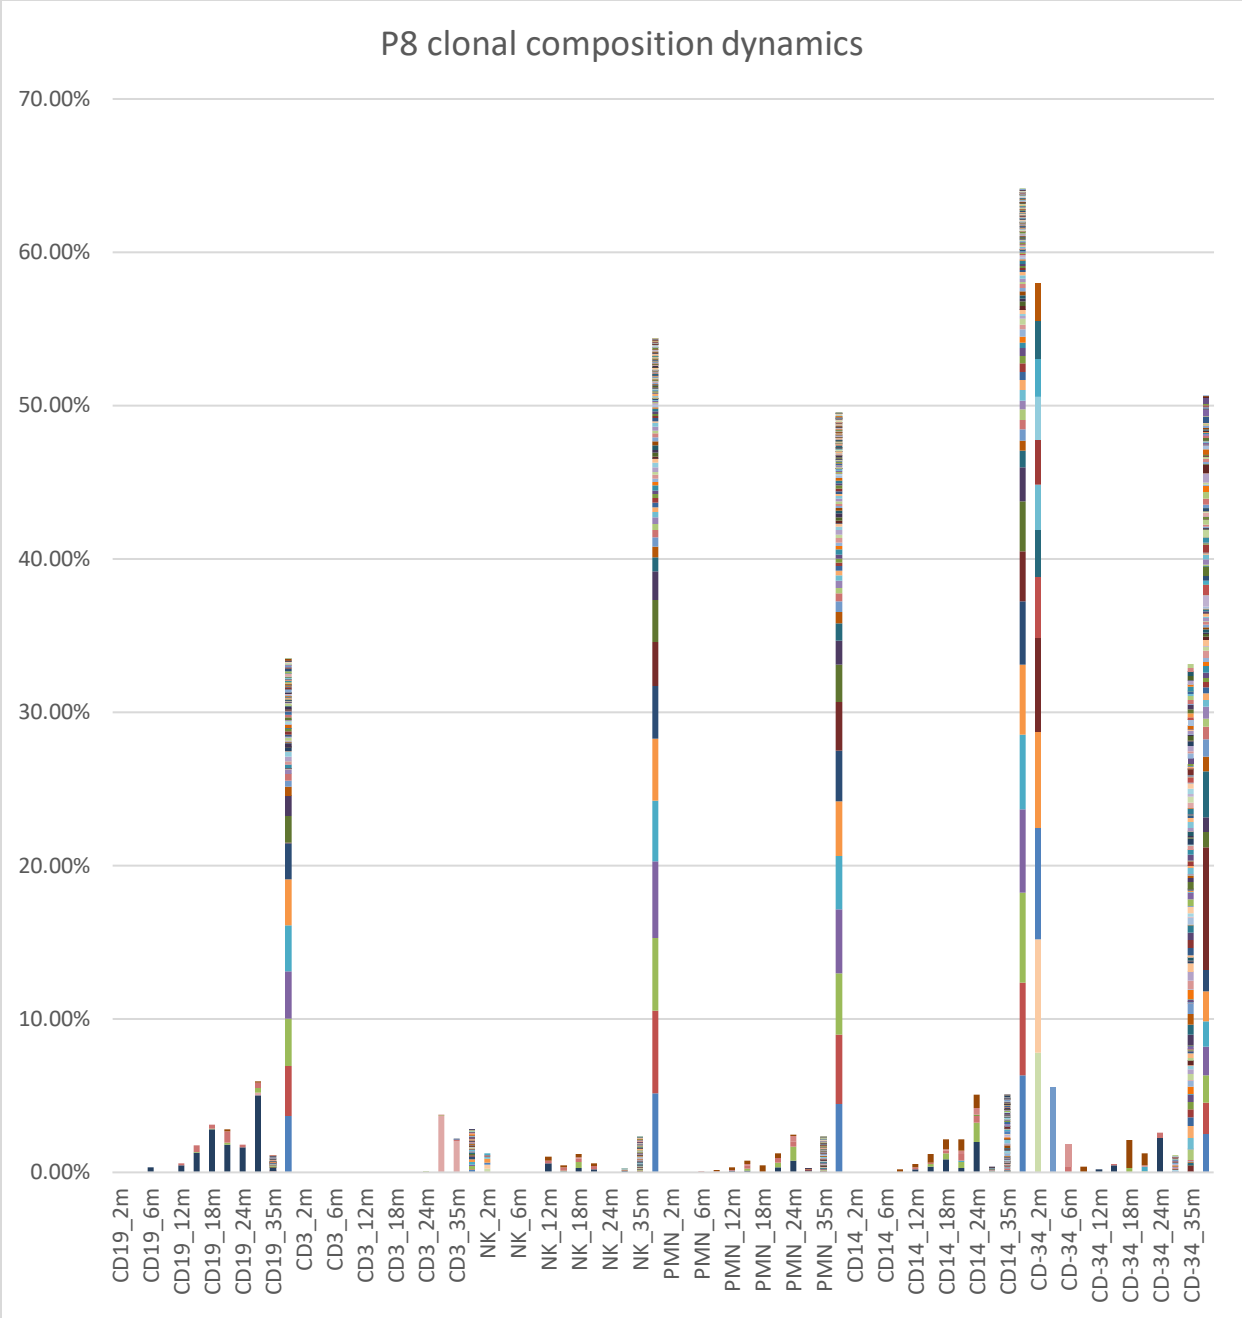

Figure S2 Progression of clonal composition in B, T, NK, PMN, CD14 and CD34 lineages after treatment in subjects P1, P3, P4, P5, P6, P7 and P8.

Figure S3

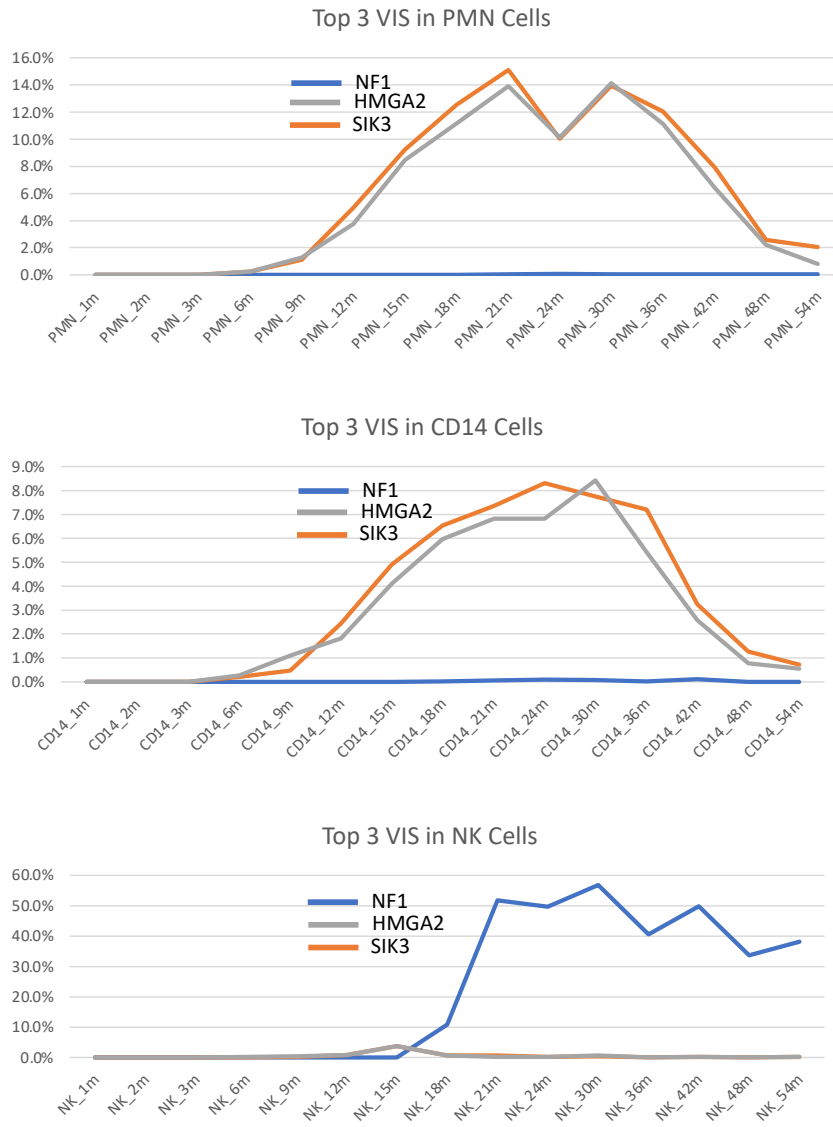

Figure S3 Quantitative frequency assessment of the top three most abundant vector insert sites (VIS) in polymorphonuclear (PMN), CD14 and Natural Killer (NK) cells in P3. Orange curve represents *SIK3*, gray *HMGA2*, blue *NF1*.

Figure S4

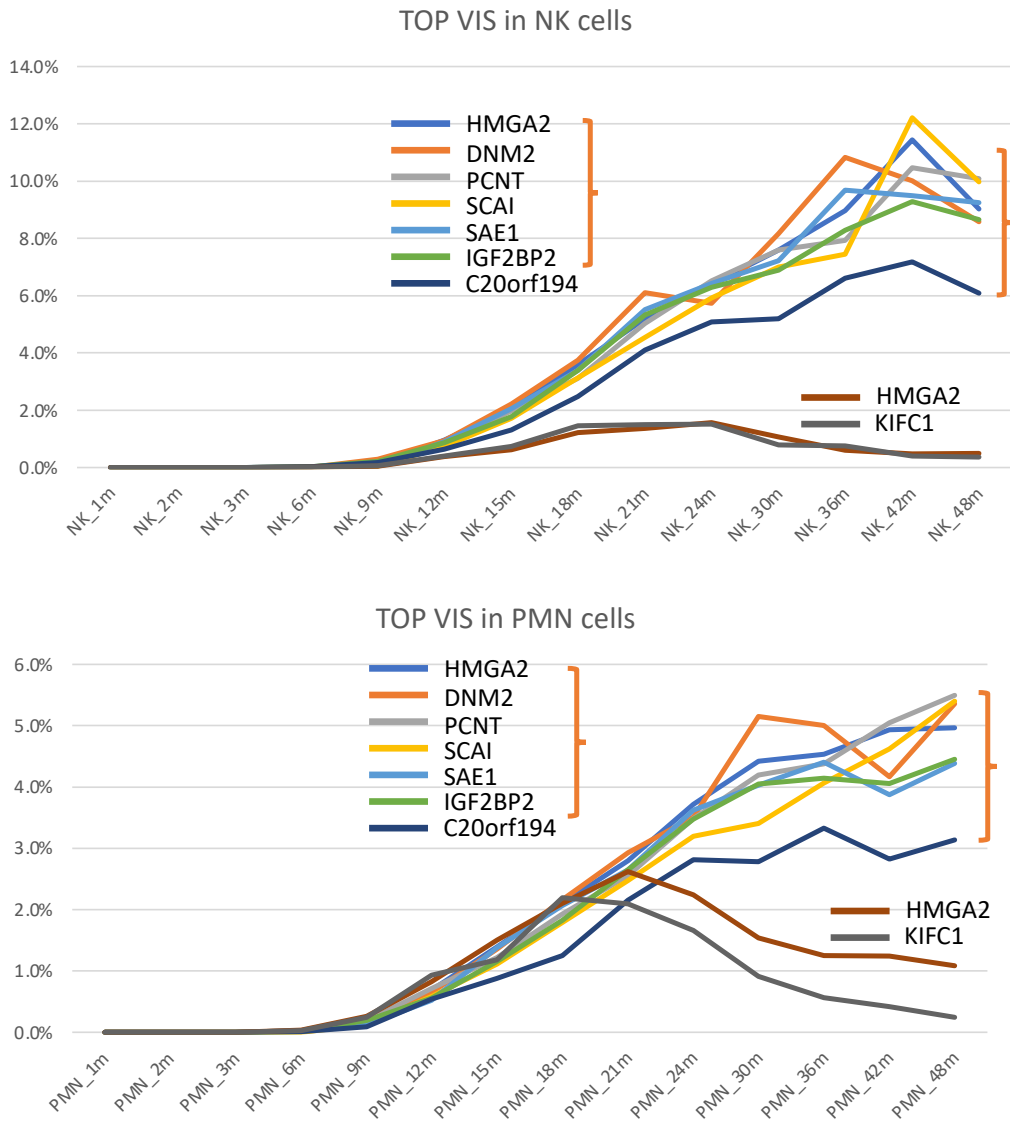

Figure S4 Quantitative frequency assessment of the top most abundant vector insert sites (VIS) in Natural Killer (NK) and polymorphonuclear (PMN) cells in P4.

Figure S5

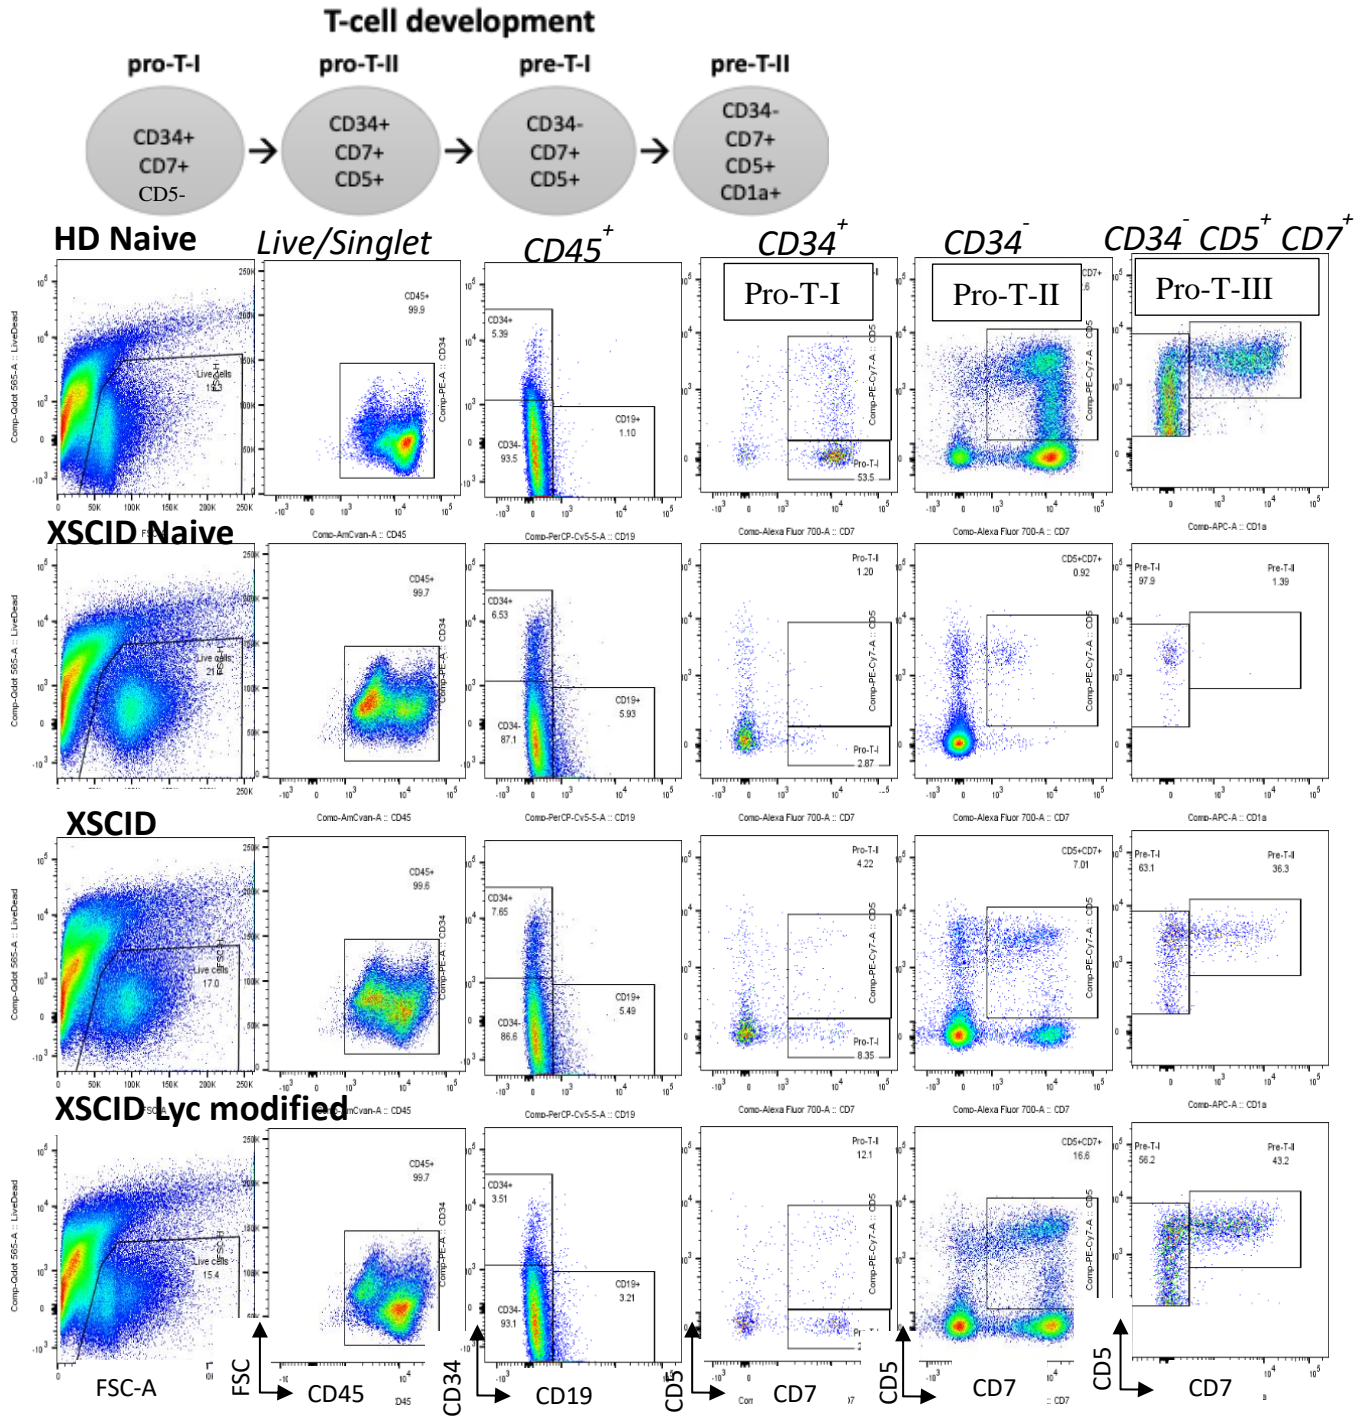

Figure S5

Gating strategy for assessment of T-cell development *in vitro* using Artificial Thymic Organoids. The columns show pro-TI (CD34+CD7+), pro-T-II (CD34+CD7+CD5+), pre-T-I (CD34-CD7+5+), and pre-T-II (CD34-CD7+CD5+CD1a+) populations.
